# Supplementary material for: Peptide Inhibitor of Complement C1, RLS-0071, Reduces Zosteriform Spread of Herpes Simplex Virus Type 1 Skin Infection and Promotes Survival in Infected Mice
Source: MDPI journal article supplement (doi:10.3390/v13081422), 2021-07-22
Supplement: s1 [file s1]

# Supplementary Information

## Peptide Inhibitor of Complement C1, RLS-0071, Reduces Zosteriform Spread of Herpes Simplex Virus Type 1 Skin Infection and Promotes Survival in Infected Mice

Maimoona S. Bhutta<sup>1</sup>, Daniel G. Sausen<sup>1</sup>, Kirstin M. Reed<sup>1</sup>, Elisa S. Gallo<sup>2</sup>, Pamela S. Hair<sup>3</sup>, Brittany P. Lassiter<sup>3</sup>, Neel K. Krishna<sup>3</sup>, Kenji M. Cunnion<sup>1,3,4,5,6</sup> and Ronen Borenstein<sup>1\*</sup>

<sup>1</sup> Department of Microbiology and Molecular Cell Biology, Eastern Virginia Medical School, Norfolk, VA 23507, USA.

<sup>2</sup> Board-certified dermatologist and independent researcher, Norfolk, VA 23507, USA.

<sup>3</sup> ReAlta Life Sciences, Inc., Norfolk, VA 23502, USA.

<sup>4</sup> Department of Pediatrics, Eastern Virginia Medical School, Norfolk, VA 23507, USA.

<sup>5</sup> Children's Specialty Group, 811 Redgate Avenue, Norfolk, VA 23507, USA.

<sup>6</sup> Children's Hospital of The King's Daughters, Norfolk, VA 23507, USA.

\* Correspondence: Ronen Borenstein, [BorensR@evms.edu](mailto:BorensR@evms.edu).

**Table S1.** Testing the antiviral effect of RLS-0071 using plaque assays. 80-85% Vero cells were pretreated with varying concentrations of RLS-0071 or HIS Buffer (control treatment) for 1 hour at 37°C. After incubation, cells were infected with 0.1MOI of GFP-HSV-1 for 1 hour at 37°C in the presence of the respective treatments. Following infection, Vero cells were washed with DPBS 1x and incubated with fresh 199V media (without treatments) for 16 hours. The viruses from the infected cells were extracted and titered using plaque assay.

| Treatment       | 0.1MOI GFP-HSV-1 | Viral Titer (PFU/mL) |
|-----------------|------------------|----------------------|
| -               | +                | $2.1 \times 10^6$    |
| 1 mM RLS-0071   | +                | $5.2 \times 10^6$    |
| 2 mM RLS-0071   | +                | $7.05 \times 10^6$   |
| 3 mM RLS-0071   | +                | $7.85 \times 10^6$   |
| 4 mM RLS-0071   | +                | $5.3 \times 10^6$    |
| 5 mM RLS-0071   | +                | $4.8 \times 10^6$    |
| 1 mM HIS Buffer | +                | $3.9 \times 10^6$    |
| 2 mM HIS Buffer | +                | $2.9 \times 10^6$    |
| 3 mM HIS Buffer | +                | $7.5 \times 10^6$    |
| 4 mM HIS Buffer | +                | $4.95 \times 10^6$   |
| 5 mM HIS Buffer | +                | $3.35 \times 10^6$   |

**Table S2.** Testing the virucidal effect of RLS-0071 using plaque assay. 0.1MOI GFP-HSV-1 cell-free virus was incubated with varying concentrations of RLS-0071 or HIS Buffer (control treatment) for 1 hour at 37°C. Following incubation, viruses with the respective treatments were used to infect 80-85% confluent Vero cells for 1 hour at 37°C, then washed with DPBS 1x and incubated with fresh 199V media (without treatments) for 16 hours. The viruses from infected cells were extracted and titered using plaque assay.

| Treatment       | 0.1MOI GFP-HSV-1 | Viral Titer (PFU/mL) |
|-----------------|------------------|----------------------|
| -               | +                | $2.5 \times 10^6$    |
| 1 mM RLS-0071   | +                | $5.9 \times 10^6$    |
| 2 mM RLS-0071   | +                | $7.05 \times 10^6$   |
| 3 mM RLS-0071   | +                | $9.45 \times 10^6$   |
| 4 mM RLS-0071   | +                | $2.85 \times 10^6$   |
| 5 mM RLS-0071   | +                | $7.15 \times 10^6$   |
| 1 mM HIS Buffer | +                | $5.3 \times 10^6$    |
| 2 mM HIS Buffer | +                | $4.8 \times 10^6$    |
| 3 mM HIS Buffer | +                | $13.3 \times 10^6$   |
| 4 mM HIS Buffer | +                | $3.9 \times 10^6$    |
| 5 mM HIS Buffer | +                | $2.8 \times 10^6$    |

No difference observed in skin infection scores of BALB/cJ mice treated with DMSO or Histidine buffer

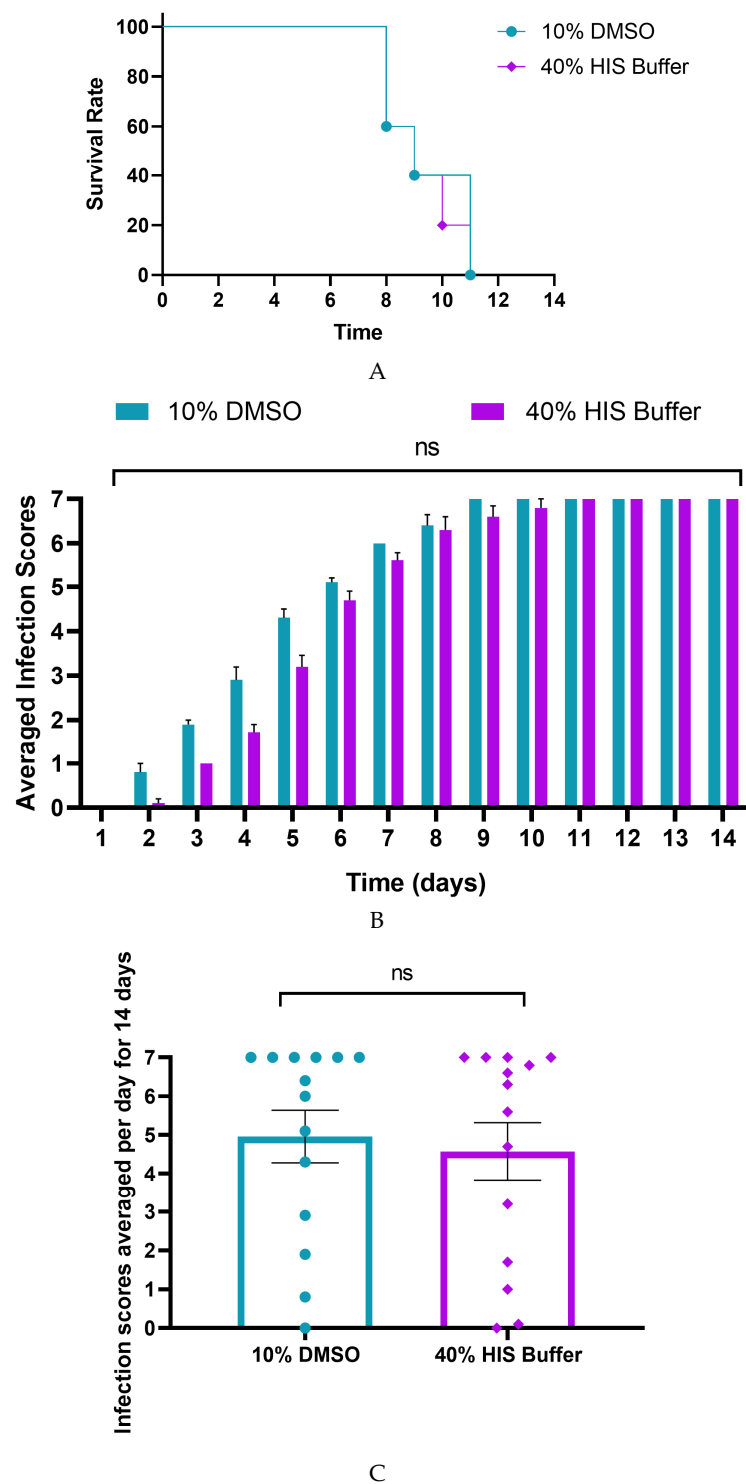

**Figure S1.** GFP-HSV-1 zosteriform infection scores of BALB/cJ mice (N = 5/treatment) following the application of 10% DMSO or 40% HIS buffer in 2.5% hydroxyethyl cellulose (HEC) gel. **(A)** Following inoculation with  $6.0 \times 10^4$  PFU of GFP-HSV-1, BALB/cJ mice received respective treatments and were monitored for survival for 14 days. **(B)** Infection scores averaged in each treatment group across 14 days. **(C)** Distribution of averaged infection score of all animals per day for 14 days. **(B/C)** Student independent t-tests (2-tailed); *ns*- non-significant. All error bars represent SEM.

ORF of sequenced ACV<sup>R</sup>-HSV-1 Thymidine kinase gene

ATGGCTTCGTACCCCTGCCATCAACACGCGTCTGCGTTTCGACCAGGCTGCGCGTTCTCGCGGCCATAACAACCGACGTAC  
GGCGTTGCGCCCTCGCCGGCAGCAAAAAGCCACGGAAGTCCGCCTGGAGCAGAAAAATGCCACGCTACTGCGGGTTTAT  
ATAGACGGTCCCCACGGGATGGGGAAAACCACCACACGCAACTGCTGGTGGCCCTGGGTTTCGCGCGACGATATCGTCT  
ACGTACCCGAGCCGATGACTTACTGGCGGGTGTGGGGGCTTCCGAGACAATCGCGAACATCTACACCACACAACACCG  
CCTCGACCAGGGTGAGATATCGGCCGGGGACGCGGCGGTGGTAATGACAAGCGCCCAGATAACAATGGGCATGCCTTA  
TGCCGTGACCGACGCCGTTCTGGCTCCTCATATCGGGGGGAGGCTGGGAGCTCACATGCCCCGCCCCGGCCCTCACCC  
TCATCTTCGACCGCCATCCCATCGCCGCCCTCCTGTGCTACCCGGCCGCGGATACCTTATGGGCAGCATGACCCCCAG  
GCCGTGCTGGCGTTCTGGCCCTCATCCCGCCGACCTTGCCCGGCACAAACATCGTGTTGGGGGGCCCTTCCGGAGGACAG  
ACACATCGACCGCTGGCCAAACGCCAGCGCCCCGGCGAGCGGCTTGACCTGGCTATGCTGGCCGCGATTGCGCCGCTT  
TATGGGCTGCTTGCCAATACGGTTCGGTATCTGCAGGGCGCGGGTCTGGCGGGAGGATTGGGGACAGCTTTCGGGGG  
CGGCCGTGCCGCCCCAGGGTGCCGAGCCCCAGAGCAACGCGGGCCACGACCCCATATCGGGGACATGTTATTTACCTT  
GTTTCGGGCCCCCGAGTTGCTGGCCCCCAACGGCGACCTGTATAACGTGTTTGCCTGGGCTTTGGACGCTTTGGCCAAAC  
GCCTCCGTCCCATGCACGTCTTTATCCTGGATTACGACCAATCGCCCCCGGGTCCCGGGACGCCCTGCTGCAACTTACCT  
CCGGGATGGTCCAGACCCACGTACCAACCCAGGCTCCATACCGACGATCTGCGACCTGGCGCGCACGTTTGCCCGGA  
GATGGGGGAGGCTAACTGA

A

| Alignment statistics |       |                                                               |                   |               |
|----------------------|-------|---------------------------------------------------------------|-------------------|---------------|
| Score                |       | Expect                                                        | Identities        | Gaps          |
| 2084 bits (1128)     |       | 0.0                                                           | 1130 / 1131 (99%) | 0 / 1131 (0%) |
|                      |       |                                                               |                   | Strand        |
|                      |       |                                                               |                   | Plus / Minus  |
| Query                | 1     | ATGGCTTCGTACCCCTGCCATCAACACGCGTCTGCGTTTCGACCAGGCTGCGCGTTCTCGC | 60                |               |
| Sbjct                | 47803 | ATGGCTTCGTACCCCTGCCATCAACACGCGTCTGCGTTTCGACCAGGCTGCGCGTTCTCGC | 47744             |               |
| Query                | 61    | GGCCATAACAACCGACGTACGGCGTTGCGCCCTCGCCGGCAGCAAAAAGCCACGGAAGTC  | 120               |               |
| Sbjct                | 47743 | GGCCATAACAACCGACGTACGGCGTTGCGCCCTCGCCGGCAGCAAAAAGCCACGGAAGTC  | 47684             |               |
| Query                | 121   | CGCCTGGAGCAGAAAATGCCACGCTACTGCGGGTTTATATAGACGGTCCCCACGGGATG   | 180               |               |
| Sbjct                | 47683 | CGCCTGGAGCAGAAAATGCCACGCTACTGCGGGTTTATATAGACGGTCCCCACGGGATG   | 47624             |               |
| Query                | 181   | GGGAAAACCACCACCACGCAACTGCTGGTGGCCCTGGGTTTCGCGCGACGATATCGTCTAC | 240               |               |
| Sbjct                | 47623 | GGGAAAACCACCACCACGCAACTGCTGGTGGCCCTGGGTTTCGCGCGACGATATCGTCTAC | 47564             |               |
| Query                | 241   | GTACCCGAGCCGATGACTTACTGGCGGGTGTGGGGGCTTCCGAGACAATCGCGAACATC   | 300               |               |
| Sbjct                | 47563 | GTACCCGAGCCGATGACTTACTGGCGGGTGTGGGGGCTTCCGAGACAATCGCGAACATC   | 47504             |               |
| Query                | 301   | TACACCACACAACACCGCCTCGACCAGGGTGAGATATCGGCCGGGGACGCGGCGGTGGTA  | 360               |               |
| Sbjct                | 47503 | TACACCACACAACACCGCCTCGACCAGGGTGAGATATCGGCCGGGGACGCGGCGGTGGTA  | 47444             |               |
| Query                | 361   | ATGACAAGCGCCCAGATAACAATGGGCATGCCTTATGCCGTGACCGACGCCGTTCTGGCT  | 420               |               |
| Sbjct                | 47443 | ATGACAAGCGCCCAGATAACAATGGGCATGCCTTATGCCGTGACCGACGCCGTTCTGGCT  | 47384             |               |
| Query                | 421   | CCTCATATCgggggggAGGCTGGGAGCTCACATGCCCCGCCCCGGCCCTCACCCCTCATC  | 480               |               |
| Sbjct                | 47383 | CCTCATATCGGGGGGAGGCTGGGAGCTCACATGCCCCGCCCCGGCCCTCACCCCTCATC   | 47324             |               |
| Query                | 481   | TTCGACCGCCATCCCATCGCCGCCCTCCTGTGCTACCCGGCCGCGGATACCTTATGGGC   | 540               |               |

Sbjct 47323 TTCGACCGCCATCCCATCGCCGCCCTCCTGTGCTACCCGGCCGCGGATACCTTATGGGC 47264

Query 541 AGCATGACCCCCCAGGCCGTGCTGGCGTTTCGTGGCCCTCATCCCCGCGACCTTGCCCGGC 600  
 |||

Sbjct 47263 AGCATGACCCCCCAGGCCGTGCTGGCGTTTCGTGGCCCTCATCCCCGCGACCTTGCCCGGC 47204

Query 601 ACAAACATCGTGTTGGGGGCCCTTCCGGAGGACAGACACATCGACCGCCTGGCCAAACGC 660  
 |||

Sbjct 47203 ACAAACATCGTGTTGGGGGCCCTTCCGGAGGACAGACACATCGACCGCCTGGCCAAACGC 47144

Query 661 CAGCGCCCCGGCGAGCGGCTTGACCTGGCTATGCTGGCCGCGATTTCGCCGCGTTTATGGG 720  
 |||

Sbjct 47143 CAGCGCCCCGGCGAGCGGCTTGACCTGGCTATGCTGGCCGCGATTTCGCCGCGTTTATGGG 47084

Query 721 CTGCTTGCCAATACGGTGCGGTATCTGCAGGGCGGCGGGTCGTGGCGGGAGGATTGGGGA 780  
 |||

Sbjct 47083 CTGCTTGCCAATACGGTGCGGTATCTGCAGGGCGGCGGGTCGTGGCGGGAGGATTGGGGA 47024

Query 781 CAGCTTTCGGGGGCGGCCGTGCCGCCCCAGGGTGCCGAGCCCCAGAGCAACGCGGGCCCA 840  
 |||

Sbjct 47023 CAGCTTTCGGGGGCGGCCGTGCCGCCCCAGGGTGCCGAGCCCCAGAGCAACGCGGGCCCA 46964

Query 841 CGACCCCATATCGGGGACA TGTATTTACCCTGTTTCGGGCCCCCGAGTTGCTGGCCCCC 900  
 |||

Sbjct 46963 CGACCCCATATCGGGGACA C GTTATTTACCCTGTTTCGGGCCCCCGAGTTGCTGGCCCCC 46904

Query 901 AACGGCGACCTGTATAACGTGTTTGCCTGGGCTTTGGACGTCTTGGCCAAACGCCTCCGT 960  
 |||

Sbjct 46903 AACGGCGACCTGTATAACGTGTTTGCCTGGGCTTTGGACGTCTTGGCCAAACGCCTCCGT 46844

Query 961 CCCATGCACGTCTTTATCCTGGATTACGACCAATCGCCCGCGGCTGCCGGGACGCCCTG 1020  
 |||

Sbjct 46843 CCCATGCACGTCTTTATCCTGGATTACGACCAATCGCCCGCGGCTGCCGGGACGCCCTG 46784

Query 1021 CTGCAACTTACCTCCGGGATGGTCCAGACCCACGTACCCACCCCAGGCTCCATACCGACG 1080  
 |||

Sbjct 46783 CTGCAACTTACCTCCGGGATGGTCCAGACCCACGTACCCACCCCAGGCTCCATACCGACG 46724

Query 1081 ATCTGCGACCTGGCGCGCACGTTTGCCCGGGAGATGGGGGAGGCTAACTGA 1131  
 |||

Sbjct 46723 ATCTGCGACCTGGCGCGCACGTTTGCCCGGGAGATGGGGGAGGCTAACTGA 46673

B

|       | Score              | Expect                                                       | Method                             | Identities      | Positives       | Gaps         | Frame |
|-------|--------------------|--------------------------------------------------------------|------------------------------------|-----------------|-----------------|--------------|-------|
|       | 767 bits<br>(1980) | 0.0                                                          | Compositional matrix adjust.       | 375 / 376 (99%) | 375 / 376 (99%) | 0 / 376 (0%) | +1    |
| Query | 1                  | MASYPCHQHASAFDQAARSRGHNNRR                                   | TALRPRRQQKATEVRLEQKMPTLLRVYIDGPHGM |                 |                 | 180          |       |
| Sbjct | 1                  | MASYPCHQHASAFDQAARSRGHNNRR                                   | TALRPRRQQKATEVRLEQKMPTLLRVYIDGPHGM |                 |                 | 60           |       |
| Query | 181                | GKTTTTQLLVALGSRDDIVYVPEPMTYWRVLGASETIANIYTTQHRLDQGEISAGDAAVV |                                    |                 |                 | 360          |       |
| Sbjct | 61                 | GKTTTTQLLVALGSRDDIVYVPEPMTYWRVLGASETIANIYTTQHRLDQGEISAGDAAVV |                                    |                 |                 | 120          |       |
| Query | 361                | MTSAQITMGMPYAVTDAVLAPHIGGEAGSSHAPPPALTLIFDRHPIAALLCYPAARYLMG |                                    |                 |                 | 540          |       |
| Sbjct | 121                | MTSAQITMGMPYAVTDAVLAPHIGGEAGSSHAPPPALTLIFDRHPIAALLCYPAARYLMG |                                    |                 |                 | 180          |       |

|       |      |                                                                        |      |
|-------|------|------------------------------------------------------------------------|------|
| Query | 541  | SMTPQAVLAFVALIPPTLPGTNIVLGALPEDRHIDRLAKRQRPGERLDLAMLAAIRRVYG           | 720  |
|       |      | SMTPQAVLAFVALIPPTLPGTNIVLGALPEDRHIDRLAKRQRPGERLDLAMLAAIRRVYG           |      |
| Sbjct | 181  | SMTPQAVLAFVALIPPTLPGTNIVLGALPEDRHIDRLAKRQRPGERLDLAMLAAIRRVYG           | 240  |
| Query | 721  | LLANTVRYLQGGGSWREDWGQLSGAAVPPQGAEPQSNAGPRPHIGD <b>M</b> LFTLFRAPPELLAP | 900  |
|       |      | LLANTVRYLQGGGSWREDWGQLSGAAVPPQGAEPQSNAGPRPHIGD LFTLFRAPPELLAP          |      |
| Sbjct | 241  | LLANTVRYLQGGGSWREDWGQLSGAAVPPQGAEPQSNAGPRPHIGD <b>T</b> LFTLFRAPPELLAP | 300  |
| Query | 901  | NGDLYNVFAWALDVLAKRLRPMHVFILDYDQSPAGCRDALLQLTSGMVQTHVTTTPGSIPT          | 1080 |
|       |      | NGDLYNVFAWALDVLAKRLRPMHVFILDYDQSPAGCRDALLQLTSGMVQTHVTTTPGSIPT          |      |
| Sbjct | 301  | NGDLYNVFAWALDVLAKRLRPMHVFILDYDQSPAGCRDALLQLTSGMVQTHVTTTPGSIPT          | 360  |
| Query | 1081 | ICDLARTFAREMGEAN 1128                                                  |      |
|       |      | ICDLARTFAREMGEAN                                                       |      |
| Sbjct | 361  | ICDLARTFAREMGEAN 376                                                   |      |

C

**Figure S2.** Analysis of ACV<sup>R</sup>-HSV-1 thymidine kinase gene sequence using PubMed BLASTn and BLASTx. **(A)** Open reading frame of sequenced acyclovir-resistant HSV-1 thymidine kinase gene. **(B)** Nucleotide sequence alignment generated using ORF of viral TK gene and NCBI Human alphaherpesvirus 1 strain 17, complete genome (Sequence ID: BK012101.1); match with the range of 46673 to 47803. The mutation in ACV<sup>R</sup>-HSV-1 TK gene (query 1) occurring at nt 860 (C→ T) is highlighted in yellow. **(C)** Amino acid sequence analysis using BLASTx of mutated TK of ACV<sup>R</sup>-HSV-1 with wild-type thymidine kinase [Human alphaherpesvirus 1] (NCBI Sequence ID: YP\_009137097.1), with length of 376aa and 1 possible match. The mutation sequence (in query 1) occurring at aa 287 (T→ M) is highlighted in yellow.
